# Supplementary material for: How Can Sport-Based Interventions Improve Health among Women and Girls? A Scoping Review
Source: MDPI journal article supplement (doi:10.3390/ijerph20064818), 2023-03-09
Supplement: s1 [file s1]

PubMed Search MeSH Terms:

| MeSH Term   | Sports                         | Health Equity  | Health Inequities                                                                                                                                   | Gender Equity                                                                                                                                                                                                               |
|-------------|--------------------------------|----------------|-----------------------------------------------------------------------------------------------------------------------------------------------------|-----------------------------------------------------------------------------------------------------------------------------------------------------------------------------------------------------------------------------|
| MeSH ID #   | D013177                        | D000069576     | D000091682                                                                                                                                          | D000084803                                                                                                                                                                                                                  |
| Entry Terms | Sport<br>Athletics<br>Athletic | Equity, Health | Health Inequity<br>Inequities, Health<br>Inequity, Health<br>Health Inequalities<br>Health Inequality<br>Inequalities, Health<br>Inequality, Health | Equity, Gender<br>Gender Equities<br>Gender Inequality<br>Gender Inequalities<br>Inequality, Gender<br>Gender Inequity<br>Gender Inequities<br>Inequity, Gender<br>Gender Equality<br>Equality, Gender<br>Gender Equalities |
